# Supplementary material for: A dataset of 190 lakes' ice phenology on the Tibetan Plateau extracted from AMSR2 data
Source: Copernicus journal article supplement (doi:10.5194/essd-2023-441), 2024-01-10
Supplement: Supplementary file [file essd-2023-441-RC1-supplement.pdf]

This manuscript introduces a novel dataset detailing the ice phenology of small lakes (< 50km<sup>2</sup>) through the integration of Brightness Temperatures (T<sub>b</sub>) from passive microwave observations with air temperature (T<sub>a</sub>) data sourced from ERA5, specifically focusing on the Tibetan Plateau (TP). The incorporation of air temperature data proves pivotal in mitigating seasonal fluctuations and amplifying the discernible differences of T<sub>b</sub> at frozen and ice-free seasons. Overall, the method is interesting but may not be robust for generating a dataset. Please find my questions below.

1. Now it is very common that studies integrate both high-resolution optical data and PMW data to generate high-resolution, continuous snow surface properties, such as snow depth [1], snow albedo phenology [2], snow fraction [3], and snow mask [4,5]. I believe if you follow such similar ideas, you may get better results, and the way T<sub>a</sub> and T<sub>b</sub>s used in this study is a little bit simplified.
2. The sensitivity test between lake size and the model accuracy should be given. Even though including T<sub>a</sub> may remove the seasonal cycle to some degree, it does not mean this proposed method works for all small lakes. Such analysis will give the readers a hint of how robust the model is in different lake sizes.
3. The fundamental assumption underlying this work, as I understand it, is that ERA5 T<sub>a</sub> exhibits a closely aligned seasonal cycle with T<sub>b</sub>, enabling the removal of this cycle and thereby enhancing the discernible T<sub>b</sub> changes. However, in theory, variations in the timings of peaks and valleys in annual cycles of T<sub>a</sub> versus surface/soil temperatures are very different. Fig 2b also indicates that the annual valley of T<sub>a</sub> is ahead of T<sub>b</sub>. How do the authors deal with such a mismatch?
4. Would the post modification (Sect. 2.3.3) be too subjective to affect the proposed data to be used for application (e.g., temporal trend analysis)? A year-to-year temporal variations of the FUS, FUE, BUS, and BUE are needed to test the stability.
5. Reanalysis T<sub>a</sub> has a very large uncertainty in TP areas because of the incorrect snow cover simulation [6].
6. Examples in Figure 5 still provide pretty large lakes that are larger than one single pixel thus its phenology won't be very hard to be detected. Some cases for sub-pixel lakes are necessary.
7. In Fig 3b, there are T<sub>b</sub>s in ice-free season, especially during 2013.09 – 11, making the first threshold not robust.
8. Any spatial maps of threshold T<sub>b</sub>s/dates for different lakes? The map like Fig 8 has few spatial details.
9. Line172: why the thresholds for breakup periods were always higher than those for freeze-up periods
10. The manuscript requires additional accuracy evaluation and data variation analysis, such as the statistics of the lake areas, freeze/thaw date annual variation. The cross validation with MODIS is not enough, any ground measurements? NASA IMS snow/ice cover can be another high-resolution continuous reference data.

## Minor

The definition of mid- and small lakes should be clarified in the abstract.

Line 101: spell the LIP where it appears for the first time in the article.

Line 94: any processing for the AMSR2 swath gaps? They are very common in TP areas.

Line 97: ERA5-land has much higher spatial resolution compared to ERA5, why not choose ERA5-land?

Line 60, please add one sentence to clarify why previous studies cannot involve mid- and small lakes. As you are using the same input data, why this study can capture the free-thaw info from the subpixel?

As a manuscript for a data journal, this is for end users. Suggest including one or two sentences to introduce why PMW data can capture the freeze-thaw signals.

Include this study in Table 1

Line 79: any specific value range of the object lake areas? how these object lakes were selected? Manually?

[1] Xiong, Chuan, et al. "Mountain Snow Depth Retrieval from Optical and Passive Microwave Remote Sensing Using Machine Learning." *IEEE Geoscience and Remote Sensing Letters* 19 (2022): 1-5.

[2] Jia, Aolin, et al. "Improved cloudy-sky snow albedo estimates using passive microwave and VIIRS data." *ISPRS Journal of Photogrammetry and Remote Sensing* 196 (2023): 340-355.

[3] Xiao, Xiongxin, et al. "Estimating fractional snow cover from passive microwave brightness temperature data using MODIS snow cover product over North America." *The Cryosphere* 15.2 (2021): 835-861.

[4] Kumar, Sujay V., et al. "Quantifying the added value of snow cover area observations in passive microwave snow depth data assimilation." *Journal of Hydrometeorology* 16.4 (2015): 1736-1741.

[5] Foster, James L., et al. "A blended global snow product using visible, passive microwave and scatterometer satellite data." *International journal of remote sensing* 32.5 (2011): 1371-1395.

[6] Meng, X., et al. "Simulated cold bias being improved by using MODIS time-varying albedo in the Tibetan Plateau in WRF model." *Environmental Research Letters* 13.4 (2018): 044028.
